# Supplementary material for: An Engineered N-Cadherin Substrate for Differentiation, Survival, and Selection of Pluripotent Stem Cell-Derived Neural Progenitors
Source: PubMed Central journal article supplement (PMC4526632; doi:10.1371/journal.pone.0135170), 2015-08-05
Supplement: pone.0135170.s007.pdf [file pone.0135170.s007.pdf]

**Table S1.** Primer sequences used in qPCR

| Gene                  | Sequence (forward/reverse)                          |
|-----------------------|-----------------------------------------------------|
| Nanog                 | GAGGAAGCATCGAATTCTGG<br>AAGTTATGGAGCGGAGCAGC        |
| N-cadherin            | CAGTCTTACCGAAGGATGTGC<br>ATCAGCTCTCGATCCAGAGG       |
| Nestin                | GCTACATACAGGACTCTGCTG<br>AAACTCTAGACTCACTGGATTCT    |
| Neurogenin1<br>(Ngn1) | CGATCCCCTTTTCTCCTTTC<br>TGCAGCAACCTAACAAAGTGG       |
| $\beta$ III-tubulin   | AGCGATGAGCACGGCATAG<br>CAGGTTCCAAGTCCACCAGA         |
| GFAP                  | GGAGAGGGACAACCTTTGCAC<br>GCTCTAGGGACTCGTTCGTG       |
| Mitf                  | AGAGTCTGAAGCAAGAGCACTG<br>TGCGGTCATTTATGTTAAATCTTC  |
| Nurr                  | TGAAGAGAGCGGAGAAGGAGATC<br>TCTGGAGTTAAGAAATCGGAGCTG |
| CHAT                  | GTAACAGCCCAGGAGAGCAG<br>GCAGGGCTAGAGTTGACTGG        |
| SLC17A6               | GGTTCGATGACGTTTCTGGT<br>TCTCGGTTGTCTGCTTCTT         |
| GAD2                  | GGGATGTCAACTACGCGTTT<br>TACAGGGGCGATTCATAGG         |
| Brachyury             | CCATGCTGCAGTCCCATGA<br>GCTCACAGACCAGAGACTGGGATAC    |
| Albumin               | AGGCTACAGCGGAGCAACTGA<br>TTTGCATCTAGTGACAAGGTTTGGA  |
| $\beta$ -actin        | CCTAAGGCCAACCGTGAAAAG<br>TCTTCATGGTGCTAGGAGCCA      |
